# Supplementary material
Source: Springer Nature journal article supplement (https://www.springermedizin.de/resource/supplementary/12943_2010_800_MOESM1_ESM.pdf/9554874)

| Group  | Age of subject in years; mean $\pm$ SD |                               |         |
|--------|----------------------------------------|-------------------------------|---------|
|        | Controls                               | Cases                         | P*      |
| Male   | 40.39 $\pm$ 12.69<br>(n = 41)          | 51.33 $\pm$ 11.96<br>(n = 49) | <0.0001 |
| Female | 42.77 $\pm$ 13.48<br>(n = 27)          | 45.16 $\pm$ 11.23<br>(n = 63) | 0.4250  |
| All    | 39.9 $\pm$ 11.97<br>(n = 68)           | 47.7 $\pm$ 12.09<br>(n = 112) | <0.0001 |

\* Unpaired t-test with Welch correction and  $\chi^2$  - test

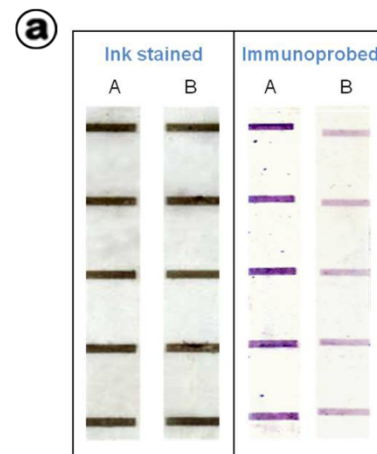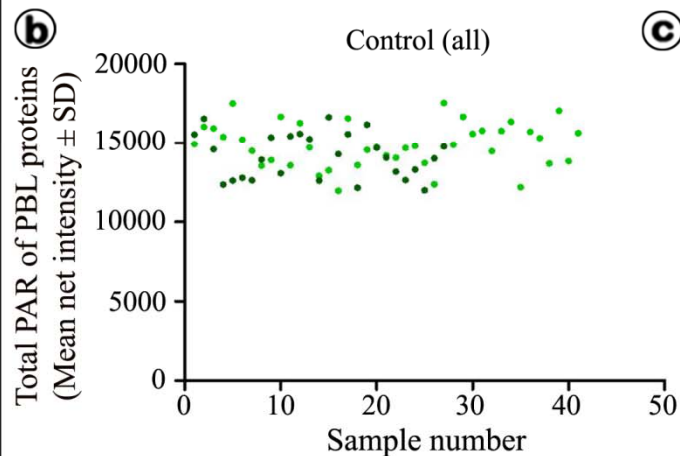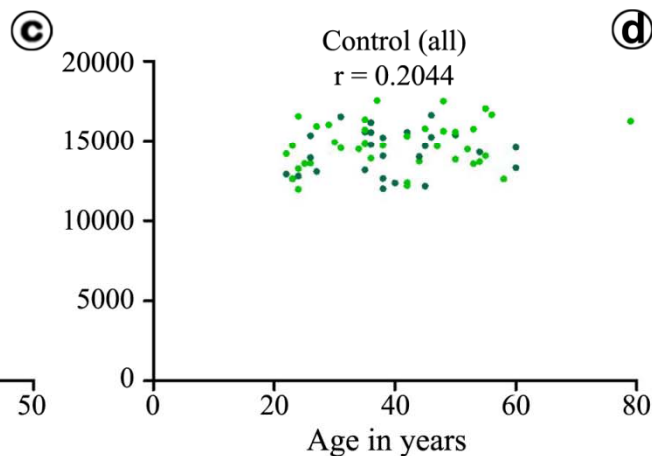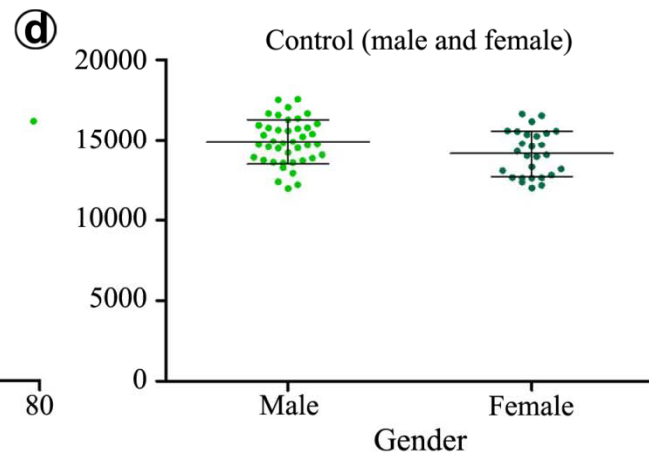

Supplement: MOESM1 [file 9554874]
